# Supplementary material for: The deep conservation of the Lepidoptera Z chromosome suggests a non-canonical origin of the W
Source: PubMed Central journal article supplement (PMC5684275; doi:10.1038/s41467-017-01663-5), 2017-11-14
Supplement: 41467_2017_1663_MOESM3_ESM.pdf [file 41467_2017_1663_MOESM3_ESM.pdf]

**File Name:** Supplementary Data 1

**Description:** Scaffold classification and homology with *B. mori* chromosomes in *C. ohridella*, *N. degeerella*, and *T. sylvina*.

**File Name:** Supplementary Data 2

**Description:** *De novo* assembly (Example of *N. degeerella*).

**File Name:** Supplementary Data 3

**Description:** Coverage values for each library and after keeping only uniquely mapped reads in *C. ohridella*.

**File Name:** Supplementary Data 4

**Description:** Coverage values for each library and after keeping only uniquely mapped reads in *N. degeerella*.

**File Name:** Supplementary Data 5

**Description:** Coverage values for each library and after keeping only uniquely mapped reads in *T. sylvina*.

**File Name:** Supplementary Data 6

**Description:** Coverage values for each library and after keeping only uniquely mapped reads in *L. lunatus*.

**File Name:** Supplementary Data 7

**Description:** Bash script for reference mapping.

**File Name:** Supplementary Data 8

**Description:** DNA coverage estimation.

**File Name:** Supplementary Data 9

**Description:** CDS *Bombyx mori*.

**File Name:** Supplementary Data 10

**Description:** Chromosomal location of *Bombyx mori* CDS.

**File Name:** Supplementary Data 11

**Description:** Female and male coverage values of scaffolds assigned to *B. mori* chromosomes in *C. ohridella*.

**File Name:** Supplementary Data 12

**Description:** Female and male coverage values of scaffolds assigned to *B. mori* chromosomes in *N. degeerella*.

**File Name:** Supplementary Data 13

**Description:** Female and male coverage values of scaffolds assigned to *B. mori* chromosomes in *T. sylvina*.

**File Name:** Supplementary Data 14

**Description:** Female and male coverage values of scaffolds assigned to *B. mori* chromosomes in *L. lunatus*.

**File Name:** Supplementary Data 15

**Description:** BLAT mapping of scaffolds onto *B. mori* genome.

**File Name:** Supplementary Data 16

**Description:** R code used to detect *in silico* Z-linked scaffolds.

**File Name:** Supplementary Data 17

**Description:** W-candidates in fasta format for *C. ohridella*.

**File Name:** Supplementary Data 18

**Description:** W-candidates in fasta format for *N. degeerella*.

**File Name:** Supplementary Data 19

**Description:** W-candidates in fasta format for *T. sylvina*.

**File Name:** Supplementary Data 20

**Description:** R code used to detect *in silico* W-candidates.

**File Name:** Supplementary Data 21

**Description:** Scaffold classification in *T. sylvina*, before adding the publicly available individual.

**File Name:** Supplementary Data 22

**Description:** R code used to identify the sex of the publicly available *T. sylvina* individual.
